# Supplementary material for: Influence of Brain Metastasis on Analgesia-Related Outcomes in Patients with Lung and Breast Cancers Treated with Naldemedine: A Propensity Score-Matched Analysis
Source: MDPI journal article supplement (doi:10.3390/jcm12226997), 2023-11-09
Supplement: s1 [file s1]

**Supplemental Table S1.** Morphine milligram equivalents conversion factor list

|                                             | Conversion factor |
|---------------------------------------------|-------------------|
| Morphine Sulfate Hydrate (po)               | 1.0               |
| Morphine Hydrochloride Hydrate (po)         | 1.0               |
| Morphine Hydrochloride Hydrate (iv)         | 2.0               |
| Oxycodone Hydrochloride Hydrate (po)        | 1.5               |
| Oxycodone Hydrochloride Hydrate (iv)        | 2.0               |
| Hydromorphone Hydrochloride (po)            | 5.0               |
| Hydromorphone Hydrochloride (iv)            | 15.0              |
| Tapentadol Hydrochloride (po)               | 0.3               |
| Tramadol Hydrochloride (po)                 | 0.2               |
| Tramadol Hydrochloride • Acetaminophen (po) | 0.2               |
| Codeine Phosphate Hydrate (po)              | 0.15              |
| Fentanyl Citrate transdermal                | 30.0              |
| Fentanyl Citrate (iv)                       | 100.0             |

iv, intravenous administration; po, per OS.
